# Supplementary material for: Arabidopsis thalianaSKP1 interacting protein 11 (At2g02870) negatively regulates the release of green leaf volatiles
Source: Royal Society of Chemistry journal article supplement (doi:10.1039/c7ra09895b), 2017-01-01
Supplement: c7ra09895b1.pdf [file c7ra09895b1.pdf]

## Appendix A

The results of RT-qPCR, in terms of CT values for wild type plants, plants over-expressing *At-SKIP11* gene and the plants expressing *At-SKIP11*-antisense sequence, are given below in the table A-1 to A-3.

Tables A1-1 to A1-3 show the calculation of changes in the gene expression levels of the target genes in the plants over-expressing *At-SKIP11* gene and the plants expressing *At-SKIP11*-antisense sequence compared to the control plants.

Table A-1 CT values, average CT values and the SD values calculated from the RT-qPCR data for the normalizer gene and the target genes in cDNA samples from *At*-WT (calibrator) plants

| Gene name | Line-1          |                 | Line-2          |                 | Line-3          |                 | Average CT | SD $\pm$ |
|-----------|-----------------|-----------------|-----------------|-----------------|-----------------|-----------------|------------|----------|
|           | Replicate1 (CT) | Replicate2 (CT) | Replicate1 (CT) | Replicate2 (CT) | Replicate1 (CT) | Replicate2 (CT) |            |          |
| Actin2    | 23.25           | 22.72           | 22.38           | 22.52           | 22.53           | 22.11           | 22.59      | 0.38     |
| Lox2      | 24.77           | 24.47           | 24.57           | 24.6            | 24.64           | 25.2            | 24.71      | 0.26     |
| HPL       | 26.19           | 25.74           | 25.44           | 25.22           | 25.74           | 25.76           | 25.68      | 0.33     |
| ADH1      | 30.59           | 30.08           | 30.08           | 30.03           | 30.08           | 29.62           | 30.08      | 0.31     |

Table A-2 CT values, average CT values and the SD values calculated from the RT-qPCR data for the normalizer gene and the target genes in cDNA samples from *At*-SKIP11 over-expressing plants

| Gene name | Line-1          |                 | Line-2          |                 | Line-3          |                 | Average CT | SD $\pm$ |
|-----------|-----------------|-----------------|-----------------|-----------------|-----------------|-----------------|------------|----------|
|           | Replicate1 (CT) | Replicate2 (CT) | Replicate1 (CT) | Replicate2 (CT) | Replicate1 (CT) | Replicate2 (CT) |            |          |
| Actin2    | 22.68           | 22.58           | 22.41           | 22.22           | 22.07           | 21.98           | 22.32      | 0.28     |
| Lox2      | 25.8            | 25.62           | 25.38           | 25.43           | 24.93           | 24.68           | 25.31      | 0.42     |
| HPL       | 25.68           | 25.64           | 25.64           | 25.45           | 26.09           | 26.63           | 25.86      | 0.43     |
| ADH1      | 31.29           | 31.11           | 31.08           | 31.32           | 31.06           | 30.92           | 31.13      | 0.15     |

Table A-3 CT values, average CT values and the SD values calculated from the RT-qPCR data for the normalizer gene and the target genes in cDNA samples from *At-SKIP11*- antisense expressing plants

| Gene name | Line-1          |                 | Line-2          |                 | Line-3          |                 | Average CT | SD $\pm$ |
|-----------|-----------------|-----------------|-----------------|-----------------|-----------------|-----------------|------------|----------|
|           | Replicate1 (CT) | Replicate2 (CT) | Replicate1 (CT) | Replicate2 (CT) | Replicate1 (CT) | Replicate2 (CT) |            |          |
| Actin2    | 22.5            | 22.25           | 22.09           | 22.03           | 22.01           | 22.31           | 22.20      | 0.19     |
| Lox2      | 24.82           | 24.53           | 24.63           | 24.6            | 24.24           | 24.69           | 24.59      | 0.20     |
| HPL       | 25.77           | 25.64           | 24.74           | 24.72           | 24.61           | 24.66           | 25.02      | 0.53     |
| ADH1      | 28.85           | 28.91           | 28.76           | 28.82           | 29.03           | 29.16           | 28.92      | 0.15     |

Table A1-1 Stepwise calculation of the changes in the expression levels of LOX2

| Sample                                 | $\Delta CT$ | $\Delta \Delta CT$<br>(with SD) | $2^{-\Delta \Delta CT}$  |
|----------------------------------------|-------------|---------------------------------|--------------------------|
| Wild Type                              | 2.12        | -----                           | -----                    |
| <i>At</i> -SKIP11 over-expressing      | 2.98        | 0.86 ( $\pm 0.5$ )              | -1.82<br>(-2.58-1 - -28) |
| <i>At</i> -SKIP11-antisense expressing | 2.39        | 0.26 ( $\pm 0.28$ )             | -1.20<br>(-1.45 - 1.01)  |

Table A1-2 Stepwise calculation of the changes in the expression levels of HPL

| Sample                                 | $\Delta CT$ | $\Delta \Delta CT$   | $2^{-\Delta \Delta CT}$ |
|----------------------------------------|-------------|----------------------|-------------------------|
| Wild Type                              | 3.10        | -----                | -----                   |
| <i>At</i> -SKIP11 over-expressing      | 3.53        | 0.43 ( $\pm 0.52$ )  | -1.35<br>(-1.35 – 1.05) |
| <i>At</i> -SKIP11-antisense expressing | 2.83        | -0.27 ( $\pm 0.56$ ) | 1.20<br>(-1.22 – 1.79)  |

Table A1-3 Stepwise calculation of the changes in the expression levels of ADH1

| Sample                                 | $\Delta CT$ | $\Delta \Delta CT$   | $2^{-\Delta \Delta CT}$  |
|----------------------------------------|-------------|----------------------|--------------------------|
| Wild Type                              | 7.50        | -----                | -----                    |
| <i>At</i> -SKIP11 over-expressing      | 8.81        | 1.31 ( $\pm 0.32$ )  | -2.48<br>(-1.99 - -3.10) |
| <i>At</i> -SKIP11-antisense expressing | 6.72        | -0.77 ( $\pm 0.24$ ) | 1.71<br>(1.44 – 2.01)    |

## Appendix B

Table B-1 Mass abundance of each line, average mass abundance and RSD values of different GLV for each type of plants.

### (a) Hexanal

| Sample       | Line-1   | Line-2   | Line-3   | Average  | RSD  |
|--------------|----------|----------|----------|----------|------|
| At-WT Plants | 45585001 | 46581910 | 49680052 | 47282321 | 4.5  |
| XN Plants    | 19288461 | 19704621 | 15563546 | 18185543 | 12.5 |
| XA Plants    | 30010598 | 35845433 | 30067618 | 31974550 | 10.5 |

### (b) (E)-2-Pentenal

| Sample       | Line-1    | Line-2   | Line-3   | Average  | RSD  |
|--------------|-----------|----------|----------|----------|------|
| At-WT Plants | 113444978 | 73518200 | 75870961 | 87611380 | 25.5 |
| XN Plants    | 16912747  | 33915526 | 37464070 | 29430781 | 37   |
| XA Plants    | 63964869  | 49805142 | 72655153 | 62141721 | 18.5 |

### (c) 1-Penten-3-ol

| Sample       | Line-1    | Line-2    | Line-3    | Average   | RSD  |
|--------------|-----------|-----------|-----------|-----------|------|
| At-WT Plants | 241863463 | 338466792 | 359369765 | 313233340 | 20   |
| XN Plants    | 49110179  | 42036601  | 51967988  | 47704923  | 10.7 |
| XA Plants    | 91860649  | 83639958  | 132434660 | 102645089 | 25.4 |

### (d) 1-Hexanol

| Sample       | Line-1   | Line-2   | Line-3   | Average  | RSD  |
|--------------|----------|----------|----------|----------|------|
| At-WT Plants | 49027469 | 71867244 | 72922205 | 64605639 | 20.9 |
| XN Plants    | 23394990 | 25680250 | 35487242 | 28187494 | 22.8 |
| XA Plants    | 66183548 | 59512647 | 59027908 | 61574701 | 6.5  |

### (e) (Z)-3-Hexen-1-ol

| Sample       | Line-1    | Line-2    | Line-3    | Average   | RSD |
|--------------|-----------|-----------|-----------|-----------|-----|
| At-WT Plants | 262078433 | 289041429 | 270964567 | 274028143 | 5   |
| XN Plants    | 114373999 | 148205454 | 112404959 | 124994804 | 16  |
| XA Plants    | 333515238 | 343876023 | 335347502 | 337579587 | 1.6 |

(f) 1-pentanol

| Sample       | Line-1   | Line-2   | Line-3   | Average  | RSD  |
|--------------|----------|----------|----------|----------|------|
| At-WT Plants | 16470680 | 13953389 | 14480109 | 14968059 | 8.9  |
| XN Plants    | 7240987  | 5985587  | 8924553  | 7383709  | 20   |
| XA Plants    | 12182263 | 9916554  | 6213437  | 9437418  | 31.9 |

Figure B1 GC-MS chromatograms after extraction of the volatiles through SPME

(a) Wild type

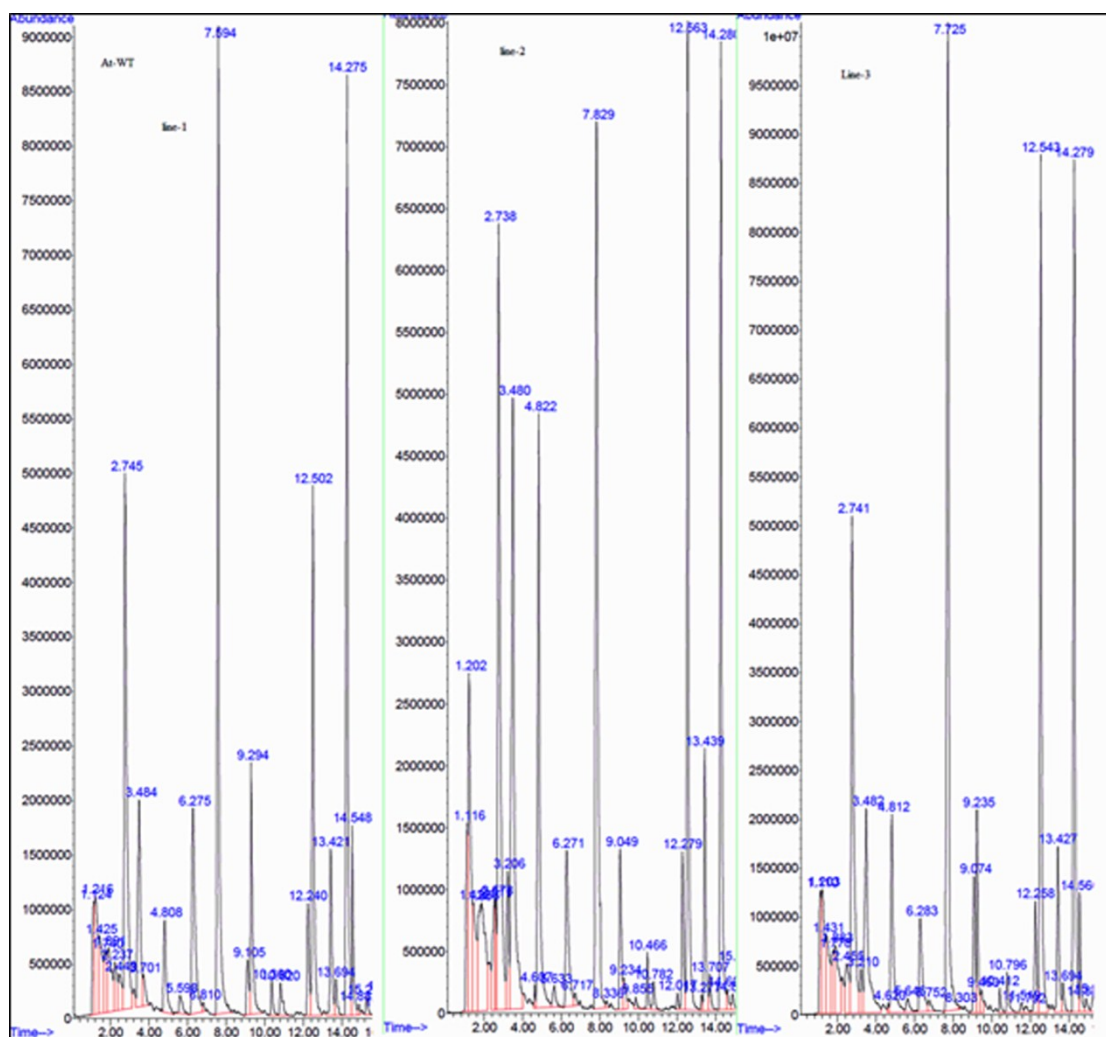

(b) *At*-SKIP11 overexpressing

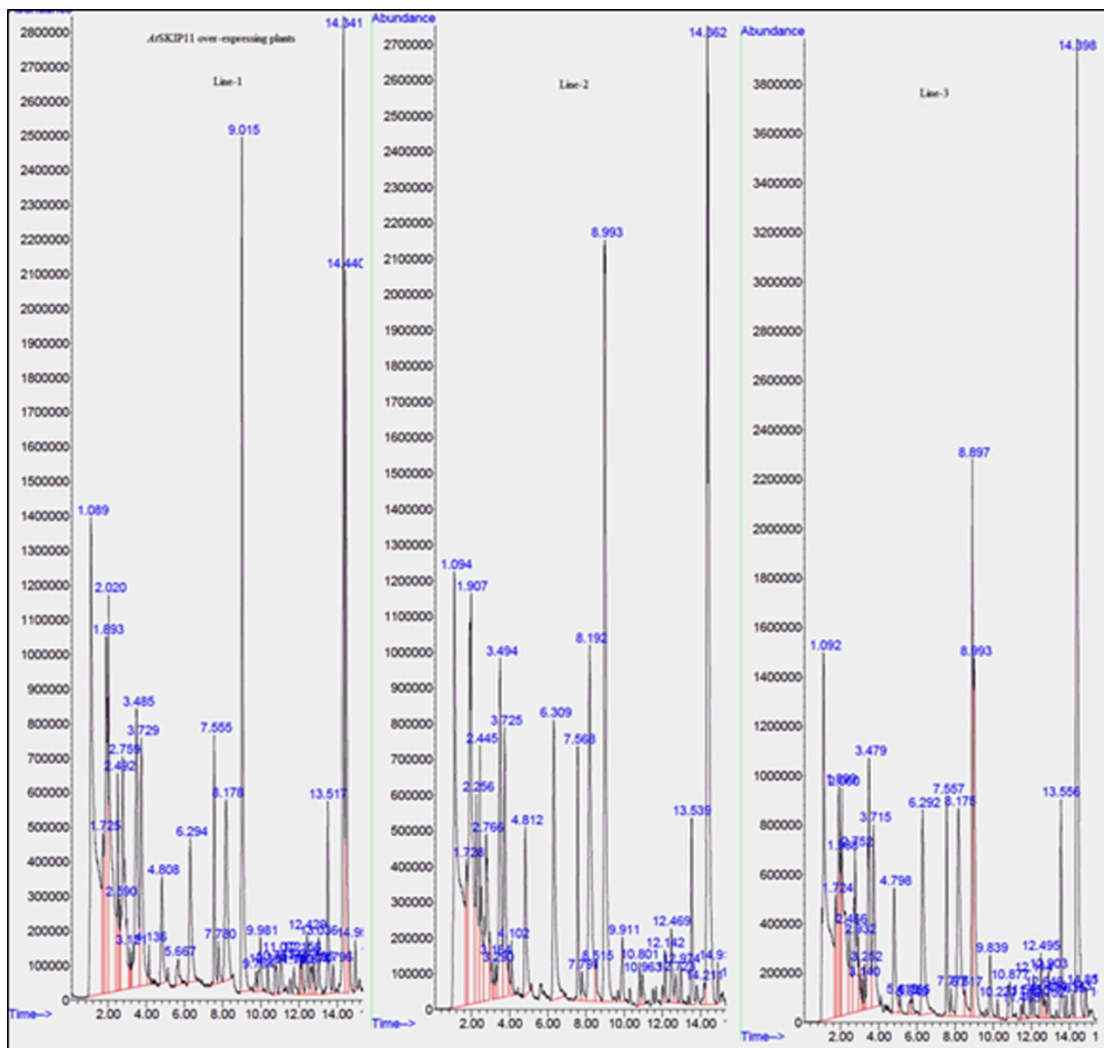

(c) *At*-SKIP11-antisense

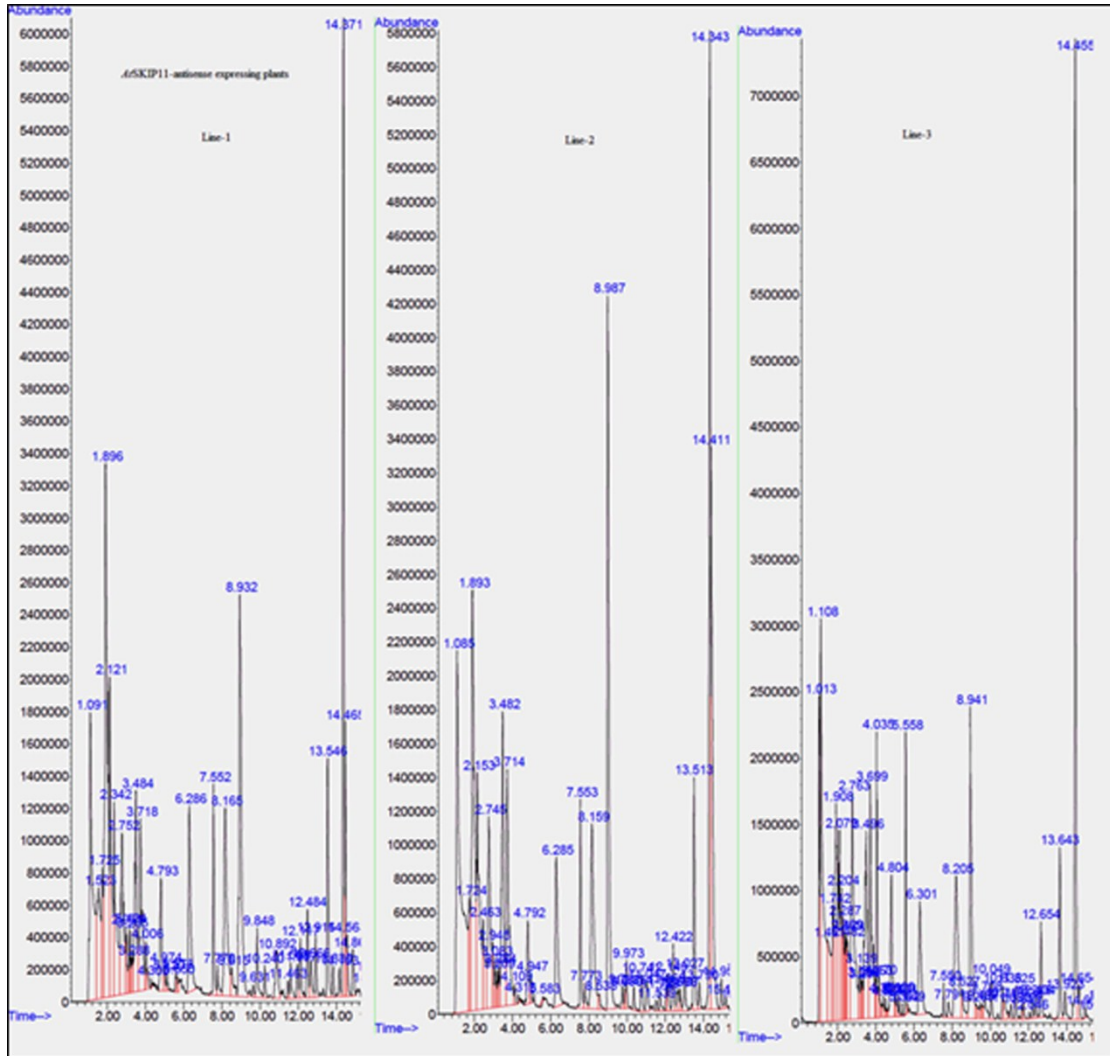



## Appendix C

Enzymes, substrates and the products of phytoxylin pathway

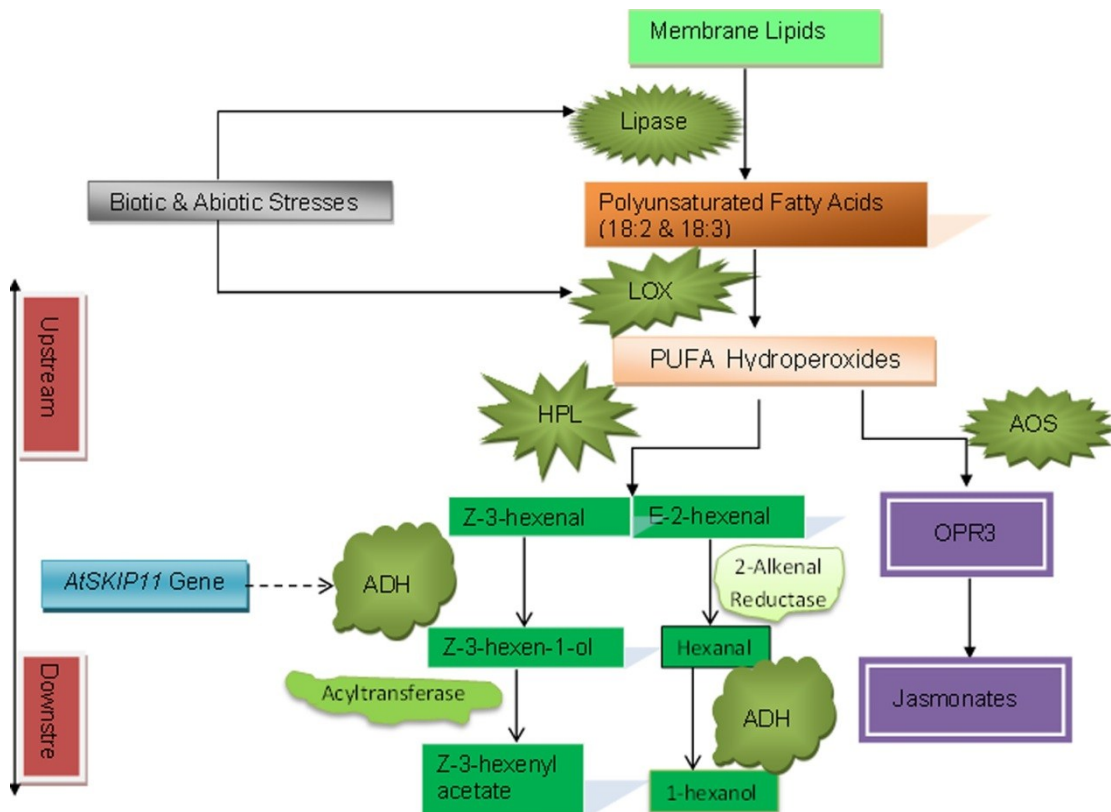

Hassan, Muhammad Naeem, Zamri Zainal, and Ismanizan Ismail. "Green leaf volatiles: biosynthesis, biological functions and their applications in biotechnology." *Plant biotechnology journal* 13.6 (2015): 727-739.
